# Supplementary material
Source: Royal Society of Chemistry journal article supplement (doi:10.1039/d6tb00600k)
Supplement: d6tb00600k1.pdf [file d6tb00600k1.pdf]

## Supplementary Information

### **MFO@BCZT- and metformin-integrated biomimetic hydrogel for magnetoelectric stimulation-induced neurogenesis and neuroprotection in synergistically promoting brain tissue repair**

Yuyan Wang<sup>1,†</sup>, Jialu Li<sup>1,†</sup>, Chengheng Wu<sup>1,2</sup>, Polina Chernozem<sup>3</sup>, Danila Koptsev<sup>3</sup>, Enhao Zhang<sup>1</sup>, Dmitry Wagner<sup>3,4</sup>, Evgeny Gerasimov<sup>5</sup>, Xiaoyin Liu<sup>6</sup>, Gleb Sukhorukov<sup>7,8</sup>, Maria Surmeneva<sup>3</sup>, Roman Surmenev<sup>3</sup>, Jie Ding<sup>1</sup>, Dan Wei<sup>1</sup>, Jing Sun<sup>1</sup>, Roman Chernozem<sup>3,\*</sup>, and Hongsong Fan<sup>1,\*</sup>

<sup>1</sup> National Engineering Research Center for Biomaterials, College of Biomedical Engineering, Sichuan University, Chengdu, Sichuan 610064, China

<sup>2</sup> Institute of Regulatory Science for Medical Devices, Sichuan University, Chengdu, Sichuan 610065, China

<sup>3</sup> National Research Tomsk Polytechnic University, 634050, Tomsk, Russia

<sup>4</sup> National Research Tomsk State University, 634050, Tomsk, Russia

<sup>5</sup> Boreskov Institute of Catalysis, 630090, Novosibirsk, Russia

<sup>6</sup> Department of Neurosurgery, West China Hospital, West China Medical School, Sichuan University, Chengdu, Sichuan 610041, China

<sup>7</sup> Center for Bio- and Medical Technologies (CBMT), Moscow 121205, Russia

<sup>8</sup> Life Improvement by Future Technology Center LLC (LIFT), Moscow 121205, Russia

† These authors contributed equally to this work.

\* Corresponding authors: romanchernozem@gmail.com (R. Chernozem),  
hsfan@scu.edu.cn (H. Fan)

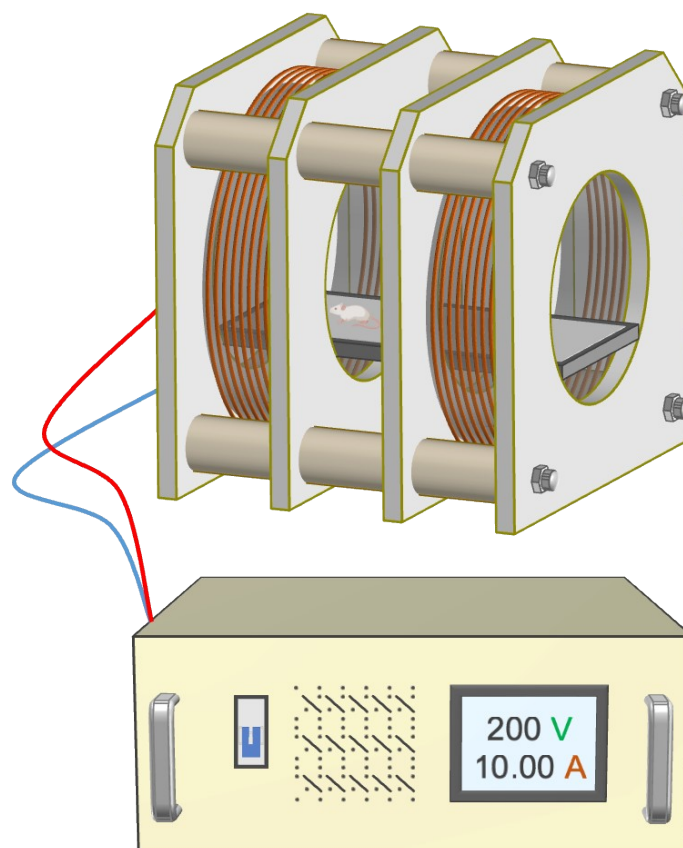

**Fig. S1.** Schematic illustration of the magnetic stimulation device.

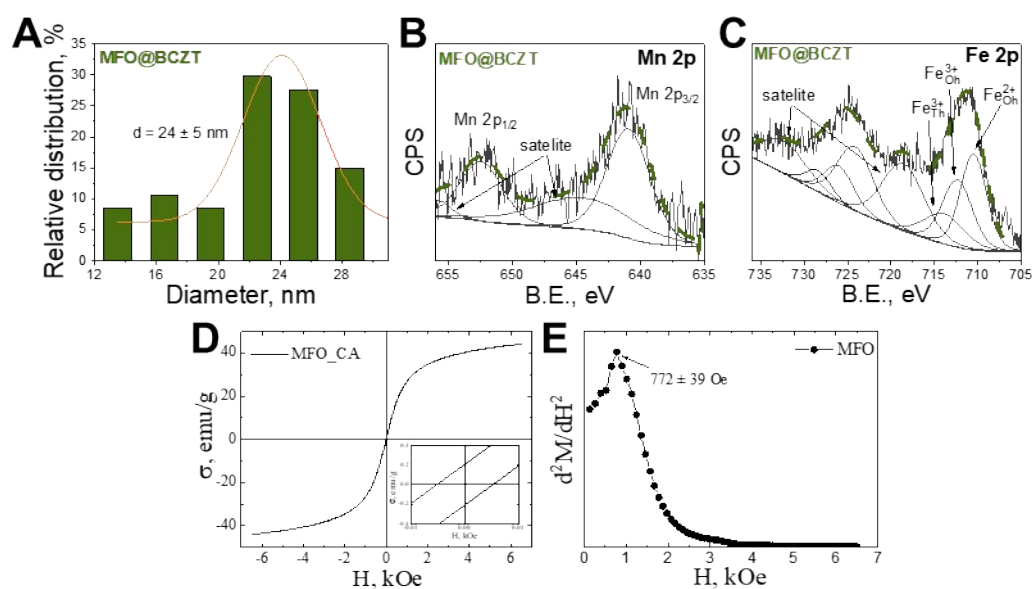

**Fig. S2.** (A) Relative distribution, High-resolution XPS spectra of (B) Mn 2p and (C) Fe 2p of MFO@BCZT NPs. (D) Magnetic hysteresis loop and (E) Second derivative of magnetization curve used for anisotropy field ( $H_a$ ) determination of MFO cores.

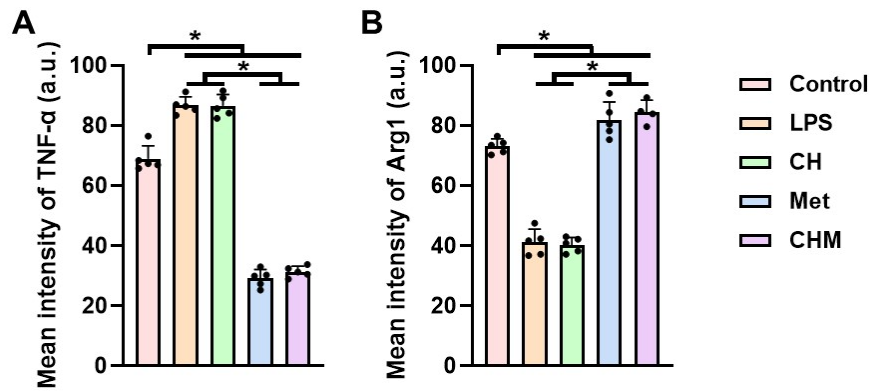

**Fig. S3.** Quantitative analysis of mean intensities of TNF- $\alpha$  (A) and Arg1 (B) based on the immunofluorescence staining images.  $n=5$ ,  $*p < 0.05$ .

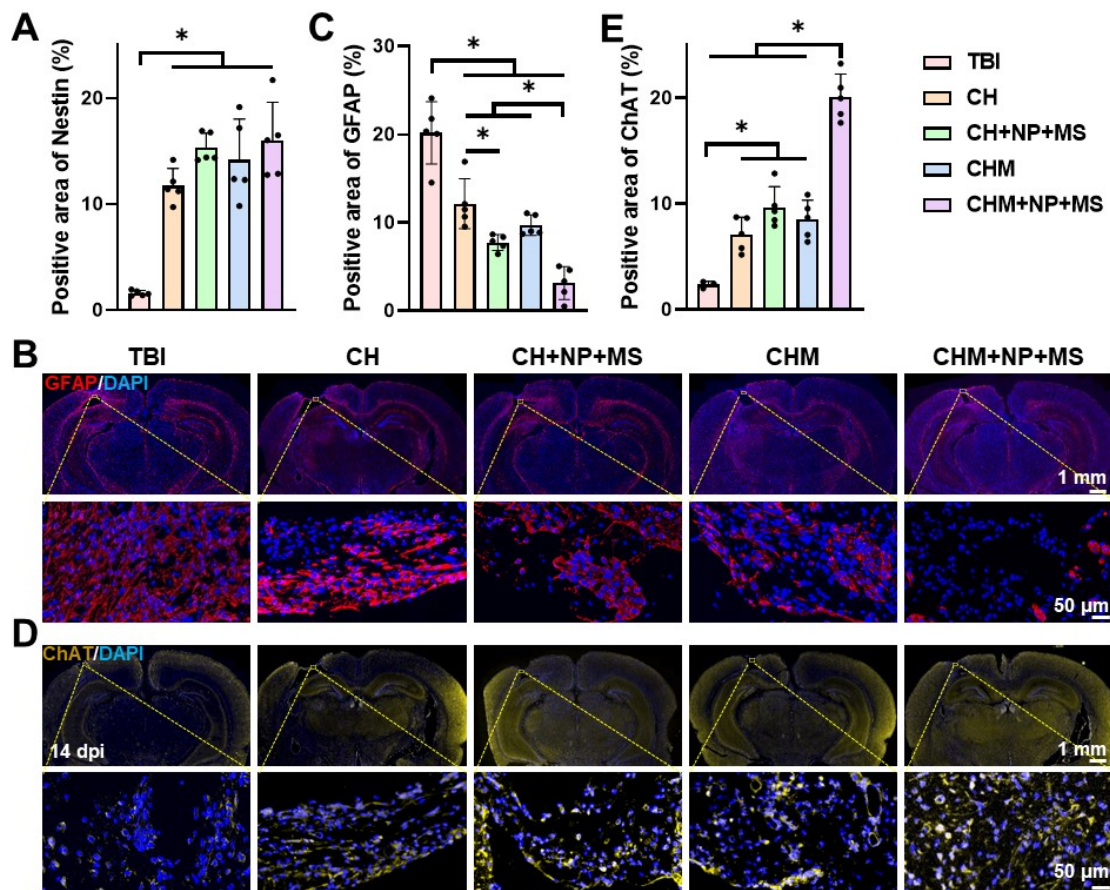

**Fig. S4.** (A) Quantitative analysis of the positive area of nestin according to corresponding immunofluorescence images. (B) Representative immunofluorescence images of GFAP-stained brain tissue sections. (C) Quantitative analysis of the positive area of GFAP according to corresponding immunofluorescence images. (D) Representative immunofluorescence images of ChAT-stained brain tissue sections. (E) Quantitative

analysis of the positive area of ChAT according to corresponding immunofluorescence images.  $n=5$ ,  $*p < 0.05$

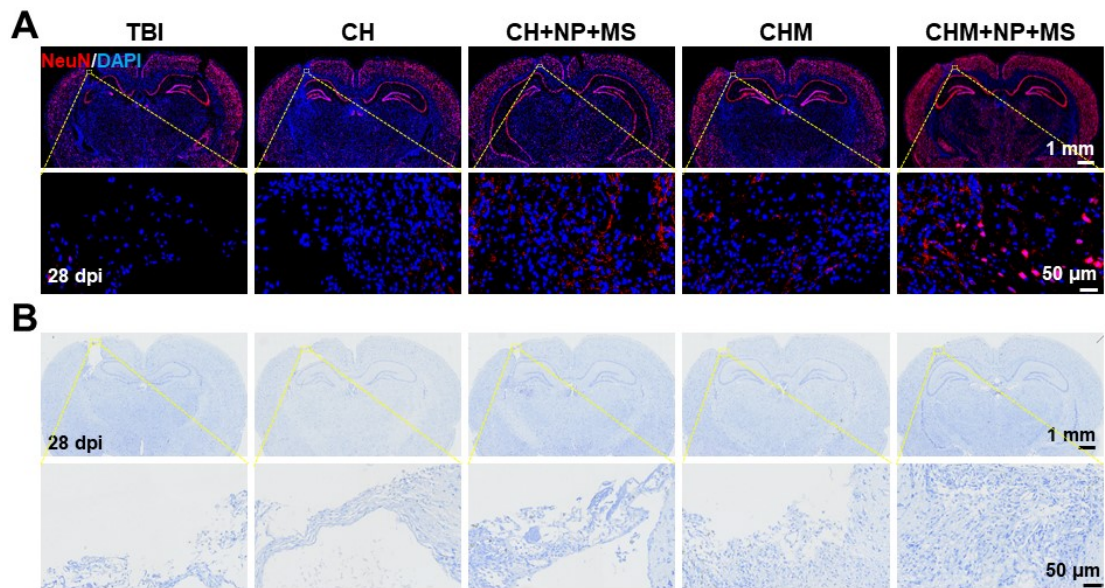

**Fig. S5.** (A) Representative immunofluorescence images of NeuN-stained brain tissue sections. (B) Typical Nissl staining images of brain tissue slices.

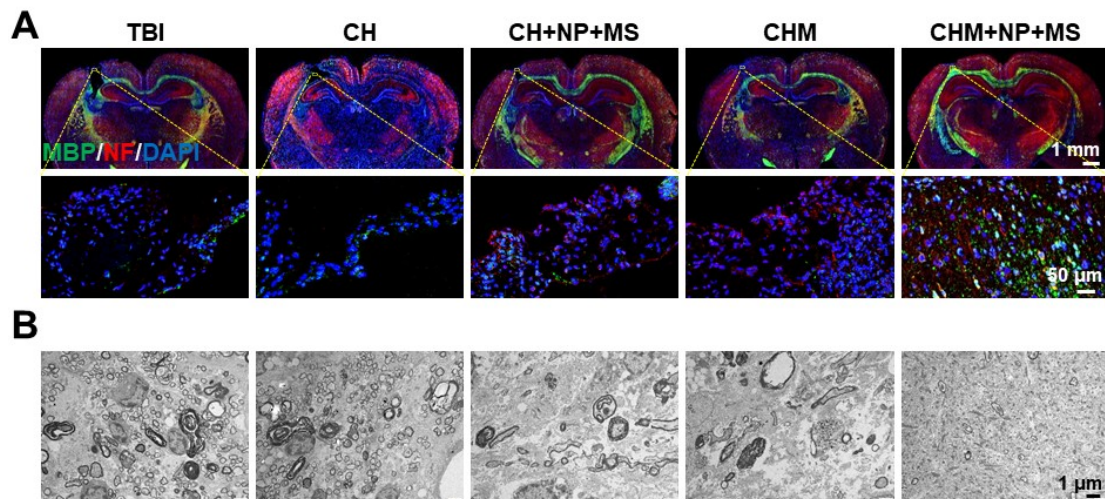

**Fig. S6.** (A) Representative immunofluorescence images of MBP (green)/NF (red)-stained brain tissue slices of all groups. (B) Representative TEM images showing the ultrastructure of myelin sheaths in lesions.

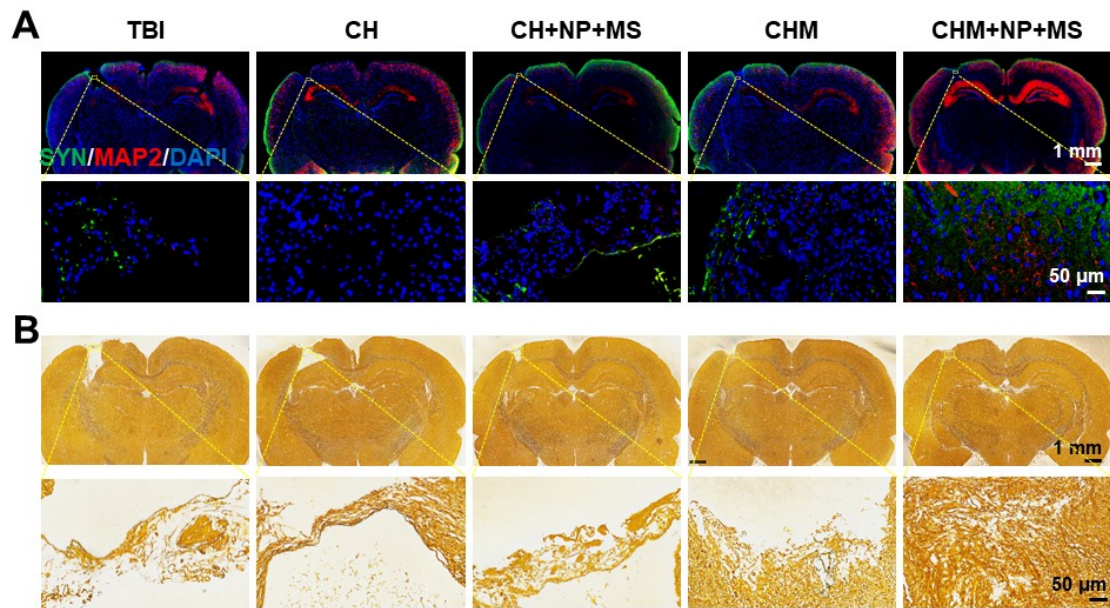

**Fig. S7.** (A) Representative immunofluorescence images of SYN (green)/MAP2 (red)-stained brain tissue slices of all groups. (B) Representative Bielschowsky silver staining images of brain tissue slices of all groups.

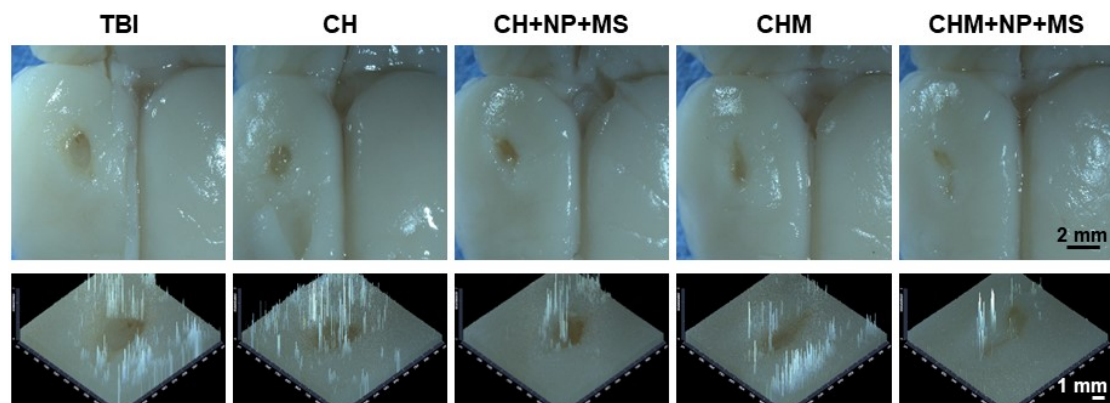

**Fig. S8.** Typical stereomicroscope images of brains in all groups.

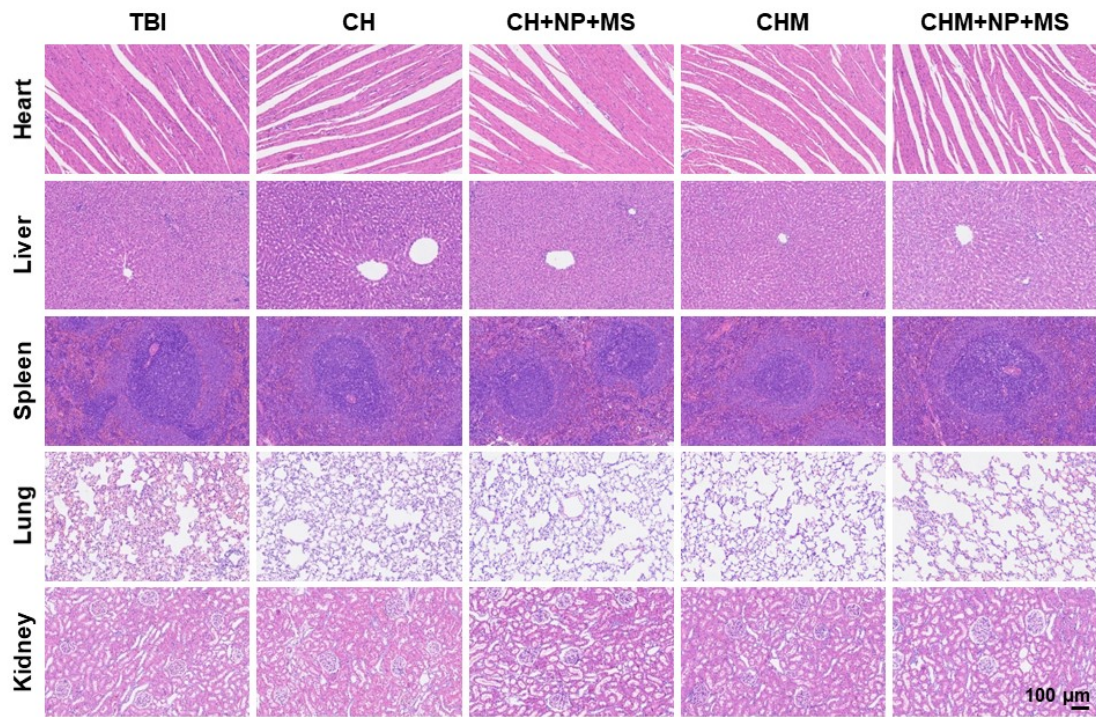

**Fig. S9.** Representative H&E staining images of the major organs of all groups.
